# Supplementary material for: Understanding the Global Burden of Influenza in Adults Aged 18–64 years: A Systematic Literature Review from 2012 to 2022
Source: Springer Nature journal article supplement (doi:10.1007/s12325-023-02610-1), 2023-07-20
Supplement: MOESM1 [file 25826340]

**TITLE: Understanding the global burden of influenza in adults aged 18–64 years: A systematic literature review from 2012 to 2022.**

**AUTHORS:**

Farzaneh Maleki, PhD<sup>1</sup>

Verna Welch, PhD, MPH<sup>2</sup>

Santiago M.C Lopez, MD<sup>2</sup>

Alejandro Cane, MD, PhD<sup>2</sup>

Jakob Langer, MSc<sup>3</sup>

Ashley Enstone, MSc<sup>4</sup>

Kristen Markus, MPH<sup>4</sup>

Olivia Wright, BSc<sup>4</sup>

Nicole Hewitt, MSc<sup>4</sup>

Isabelle Whittle, MSc<sup>4</sup>

**AFFILIATIONS:**

<sup>1</sup>Pfizer Patient & Health Impact. Cambridge, MA USA

<sup>2</sup>Pfizer Vaccines Medical & Scientific Affairs, Collegeville, PA USA

<sup>3</sup>Pfizer Patient & Health Impact. Lisbon, Portugal

<sup>4</sup>Adelphi Values PROVE, Bollington, SK10 5JB, UK

**CORRESPONDING AUTHOR**

**Name:** Farzaneh Maleki

**Mailing address:** 350 3<sup>rd</sup> St, Cambridge, 02142, MA USA

**Email address:** Farzaneh.Maleki@pfizer.com

## **Index of supplementary tables**

|                                                                               |    |
|-------------------------------------------------------------------------------|----|
| Table S1. Electronic database search strategy.....                            | 3  |
| Table S2. JBI quality appraisal of included epidemiology studies.....         | 6  |
| Table S3. JBI quality appraisal of included cohort studies .....              | 9  |
| Table S4. JBI quality appraisal of included cross-sectional studies.....      | 11 |
| Table S5. JBI quality appraisal of included economic evaluation studies ..... | 12 |
| Table S6. JBI quality appraisal of included case-control studies .....        | 13 |

**Table S1.** Electronic database search strategy.

| #  | Query                   | Results from September 20 <sup>th</sup> 2022                                                                                                                                                            |           |
|----|-------------------------|---------------------------------------------------------------------------------------------------------------------------------------------------------------------------------------------------------|-----------|
| 1  | Influenza terms         | exp influenza/                                                                                                                                                                                          | 100,437   |
| 2  |                         | exp influenza A/ or exp Influenza A virus/                                                                                                                                                              | 43,042    |
| 3  |                         | exp influenza B/ or exp Influenza B virus/                                                                                                                                                              | 5,661     |
| 4  |                         | exp seasonal influenza/                                                                                                                                                                                 | 7,036     |
| 5  |                         | (flu or influenza*).mp.                                                                                                                                                                                 | 226,346   |
| 6  |                         | or/1-5                                                                                                                                                                                                  | 226,346   |
| 7  | Clinical burden terms   | exp *hospitalization/ or exp *outpatient care/ or exp *outpatient/ or exp *outpatient department/ or exp *hospital patient/ or exp *general practice/ or exp *emergency ward/ or exp *"length of stay"/ | 204,253   |
| 8  |                         | *epidemiology/ or *morbidity/ or *mortality/ or *prevalence/ or *incidence/                                                                                                                             | 282,848   |
| 9  |                         | exp *"pharmacy (shop)"/ or exp *non prescription drug/ or exp *self medication/ or exp *clinical pathway/                                                                                               | 23,458    |
| 10 |                         | exp *social care/ or exp *home care/ or exp *long term care/ or *nursing home/ or exp *elderly care/                                                                                                    | 245,286   |
| 11 |                         | (over adj3 counter).ti,ab.                                                                                                                                                                              | 14,762    |
| 12 |                         | breakthrough.ti,ab.                                                                                                                                                                                     | 34,884    |
| 13 |                         | ((social or home or elderly or follow*) adj3 care).ti,ab.                                                                                                                                               | 100,683   |
| 14 |                         | (hospitalization or outpatient or inpatient or (length adj5 stay) or (general adj3 practice) or (emergency adj3 (ward or department))) .ti,ab.                                                          | 722,449   |
| 15 |                         | (disease adj4 (burden or impact)).ti,ab.                                                                                                                                                                | 96,554    |
| 16 |                         | (epidemiology or morbidity or mortality or prevalence or incidence).ti.                                                                                                                                 | 634,276   |
| 17 |                         | or/7-16                                                                                                                                                                                                 | 1,908,457 |
| 18 | Humanistic burden terms | exp "quality of life"/ or exp quality adjusted life year/ or exp disability-adjusted life year/ or exp absenteeism/ or exp "European Quality of Life 5 Dimensions questionnaire"/                       | 617,188   |
| 19 |                         | ("quality of life" or QoL or patient reported outcome* or ((patient or emotional or treatment) adj3 (satisfaction or dissatisfaction or response)) or "health related quality of life" or HRQoL).ti,ab. | 818,866   |
| 20 |                         | (eq adj3 5d).ti,ab.                                                                                                                                                                                     | 20,486    |
| 21 |                         | exp sleep quality/ or exp sleep/                                                                                                                                                                        | 270,800   |
| 22 |                         | or/18-21                                                                                                                                                                                                | 1,252,181 |
| 23 | Economic burden terms   | exp *health economics/                                                                                                                                                                                  | 290,861   |
| 24 |                         | exp *"cost of illness"/ or exp *"hospital cost"/ or exp *"hospitalization cost"/ or exp *"cost control"/ or exp                                                                                         | 116,776   |

|    |                                                                   |                                                                                                                                                                                                                    |           |
|----|-------------------------------------------------------------------|--------------------------------------------------------------------------------------------------------------------------------------------------------------------------------------------------------------------|-----------|
|    |                                                                   | *"drug cost"/ or exp *"health care cost"/ or exp *health care utilization/ or exp *productivity/ or exp *medical leave/                                                                                            |           |
| 25 |                                                                   | exp *economic evaluation/ or exp *"cost benefit analysis"/ or exp *"cost effectiveness analysis"/ or exp *"cost utility analysis"/ or exp *cost minimization analysis/                                             | 71,275    |
| 26 |                                                                   | (Cost* or expen* or financ* or price* or pricing or pharmaco-economic* or ((economic or societ* or socioeconomic or socio economic or illness or disease or patient* or caregiver* or carer*) adj2 burden)).ti,ab. | 1,358,762 |
| 27 |                                                                   | ((resource* adj2 (utili\$ation or use*)) or productivity or hospitali#ation* or (leave adj2 (medical or sick or disability))).ti,ab.                                                                               | 457,344   |
| 28 |                                                                   | (cost adj (effective* or utilit* or minimi* or benefit)).ti,ab.                                                                                                                                                    | 236,078   |
| 29 |                                                                   | or/23-28                                                                                                                                                                                                           | 1,877,725 |
| 30 | Older people terms                                                | exp aged/ or exp elderly care/ or exp pensioner/ or exp retirement/                                                                                                                                                | 3,459,591 |
| 31 |                                                                   | ((("65" or "70" or "75" or "80") adj3 year*).mp.                                                                                                                                                                   | 462,544   |
| 32 |                                                                   | ((old* or elder* or retire* or pensioner* or aged) adj3 (patient or person or people)).mp.                                                                                                                         | 254,389   |
| 33 |                                                                   | or/30-32                                                                                                                                                                                                           | 3,764,728 |
| 34 | Countries of interest for economic burden (not used in subtotals) | Italy/ or Spain/ or France/ or United Kingdom/ or Germany/ or United States/ or Brazil/ or Japan/ or China/ or Mexico/ or Saudi Arabia/ or Taiwan/ or Hong Kong/ or South Africa/ or Australia/                    | 2,920,946 |
| 35 |                                                                   | (Italy or Spain or France or United Kingdom or England or Wales or Scotland or Germany).mp.                                                                                                                        | 1,576,549 |
| 36 |                                                                   | (United states or USA or Japan or China or Brazil or Mexico or Saudi Arabia or Taiwan or Hong Kong or South Africa or Australia).mp.                                                                               | 3,608,308 |
| 37 |                                                                   | or/34-36                                                                                                                                                                                                           | 4,968,203 |
| 38 | Animal studies                                                    | (exp Animal/ or nonhuman/) not exp human/                                                                                                                                                                          | 6,878,040 |
| 39 | Unwanted study types                                              | exp case study/ or exp case report/ or exp letter/ or exp preliminary communication/ or exp note/ or exp editorial/ or exp editor/ or exp editorial policies/ or exp newspaper/                                    | 5,466,378 |
| 40 | Subtotal of influence and burden terms                            | 6 and (17 or 22 or 29)                                                                                                                                                                                             | 39,752    |
| 41 | Remove animal and study types                                     | 40 not (38 or 39)                                                                                                                                                                                                  | 34,271    |
| 42 | Conference proceedings prior to 2020                              | exp conference paper/ or conference abstract/ or (conference adj (abstract or paper or review or proceeding)).pt.                                                                                                  | 5,311,316 |
| 43 |                                                                   | limit 42 to yr="1990 - 2019"                                                                                                                                                                                       | 4,584,493 |
| 44 | Child terms                                                       | child/                                                                                                                                                                                                             | 1,967,382 |

|           |                                                                                |                                                                                 |           |
|-----------|--------------------------------------------------------------------------------|---------------------------------------------------------------------------------|-----------|
| <b>45</b> |                                                                                | pediatrics/                                                                     | 87,481    |
| <b>46</b> |                                                                                | (child* or p?ediatric or "under 18*" or "under 5*" or school or nursery).ti,ab. | 2,408,843 |
| <b>47</b> |                                                                                | or/44-46                                                                        | 3,067,953 |
| <b>48</b> | Clinical burden without epidemiology terms                                     | 7 or 9 or 10 or 11 or 12 or 13 or 14 or 15                                      | 1,260,887 |
| <b>49</b> | Influenza and clinical burden                                                  | 6 and 48                                                                        | 13,501    |
| <b>50</b> | Influenza and humanistic burden                                                | 6 and 22                                                                        | 8,220     |
| <b>51</b> | Influenza and economic burden                                                  | 6 and 29                                                                        | 19,395    |
| <b>52</b> | Subtotal of influenza and all burden areas                                     | 49 or 50 or 51                                                                  | 33,907    |
| <b>53</b> | Removing animal studies, unwanted study types and older conference proceedings | 52 not (43 or 38 or 39)                                                         | 24,399    |
| <b>54</b> | Removing children                                                              | 53 not 47                                                                       | 16,854    |
| <b>55</b> | Limit to 10 years                                                              | limit 54 to yr="2012 -Current"                                                  | 9,578     |
| <b>56</b> | Remove older people                                                            | 55 not 33                                                                       | 6,817     |
| <b>57</b> | Remove older people (descriptive terms only)                                   | 55 not (30 or 32)                                                               | 6,970     |

## Study quality and bias assessment results

The study quality and bias assessment tables are presented below, stratified by study type: epidemiology (Table S2), cohort (Table S3), cross-sectional (Table S4), economic (Table S5), and case-control (Table S6). The green, red, orange and gray highlight indicate ‘yes’, ‘no’, ‘unclear’ or ‘NA’ response to each question in the corresponding critical appraisal checklist.

**Table S2. JBI quality appraisal of included epidemiology studies**

|                            | Was the sample frame appropriate to address the target population? | Were study participants sampled in an appropriate way? | Was the sample size adequate? | Were the study subjects and the setting described in detail? | Was the data analysis conducted with sufficient coverage of the identified sample? | Were valid methods used for the identification of the condition? | Was vaccination confirmation measured in a standard, reliable way for all participants? | Was there appropriate statistical analysis? | Was the response rate adequate, and if not, was the low response rate managed appropriately? | Overall appraisal |
|----------------------------|--------------------------------------------------------------------|--------------------------------------------------------|-------------------------------|--------------------------------------------------------------|------------------------------------------------------------------------------------|------------------------------------------------------------------|-----------------------------------------------------------------------------------------|---------------------------------------------|----------------------------------------------------------------------------------------------|-------------------|
| Zimmerman et al. 2022(6)   |                                                                    |                                                        |                               |                                                              |                                                                                    |                                                                  |                                                                                         |                                             |                                                                                              | Low risk of bias  |
| Ono et al. 2016(29)        |                                                                    |                                                        |                               |                                                              |                                                                                    |                                                                  |                                                                                         |                                             |                                                                                              | Low risk of bias  |
| Yandrapalli et al. 2018(5) |                                                                    |                                                        |                               |                                                              |                                                                                    |                                                                  |                                                                                         |                                             |                                                                                              | Low risk of bias  |

|                                   |  |  |  |  |  |  |  |  |  |                  |
|-----------------------------------|--|--|--|--|--|--|--|--|--|------------------|
| Valenzuela-Mendez et al. 2022(63) |  |  |  |  |  |  |  |  |  | Low risk of bias |
| Lemaitre et al. 2021(32)          |  |  |  |  |  |  |  |  |  | Low risk of bias |
| Vandroux et al. 2020(46)          |  |  |  |  |  |  |  |  |  | Low risk of bias |
| Joya Montosa et al. 2020(36)      |  |  |  |  |  |  |  |  |  | Low risk of bias |
| Cohen et al. 2012(64)             |  |  |  |  |  |  |  |  |  | Low risk of bias |
| Fuller et al. 2022(3)             |  |  |  |  |  |  |  |  |  | Low risk of bias |
| Tripathi et al. 2020(65)          |  |  |  |  |  |  |  |  |  | Low risk of bias |
| Gounder et al. 2014(26)           |  |  |  |  |  |  |  |  |  | Low risk of bias |

|                                   |  |  |  |  |  |  |  |  |  |  |                  |
|-----------------------------------|--|--|--|--|--|--|--|--|--|--|------------------|
| San-Roman-Montero et al. 2019(27) |  |  |  |  |  |  |  |  |  |  | Low risk of bias |
| Boddington et al. 2017(53)        |  |  |  |  |  |  |  |  |  |  | Low risk of bias |
| Goettler et al. 2022(31)          |  |  |  |  |  |  |  |  |  |  | Low risk of bias |
| Mohammad et al. 2019(66)          |  |  |  |  |  |  |  |  |  |  | Low risk of bias |



**Table S3. JBI quality appraisal of included cohort studies**

| Study                          | Were the two groups similar and recruited from the same population? | Were the exposures measured similarly to assign people to both exposed and unexposed groups? | Was the exposure measured in a valid and reliable way? | Were confounding factors identified? | Were strategies to deal with confounding factors stated? | Were the groups/participants free of the outcome at the start of the study (or at the moment of exposure)? | Were the outcomes measured in a valid and reliable way? | Was the follow up time reported and sufficient to be long enough for outcomes to occur? | Was follow up complete, and if not, were the reasons to loss to follow up described and explored? | Were strategies to address incomplete follow up utilized? | Was appropriate statistical analysis used? | Overall appraisal |
|--------------------------------|---------------------------------------------------------------------|----------------------------------------------------------------------------------------------|--------------------------------------------------------|--------------------------------------|----------------------------------------------------------|------------------------------------------------------------------------------------------------------------|---------------------------------------------------------|-----------------------------------------------------------------------------------------|---------------------------------------------------------------------------------------------------|-----------------------------------------------------------|--------------------------------------------|-------------------|
| Li et al. 2022(33)             |                                                                     |                                                                                              |                                                        |                                      |                                                          |                                                                                                            |                                                         |                                                                                         |                                                                                                   |                                                           |                                            | Low risk of bias  |
| Yoshino et al. 2021(43)        |                                                                     |                                                                                              |                                                        |                                      |                                                          |                                                                                                            |                                                         |                                                                                         |                                                                                                   |                                                           |                                            | Low risk of bias  |
| Schoen et al. 2019(34)         |                                                                     |                                                                                              |                                                        |                                      |                                                          |                                                                                                            |                                                         |                                                                                         |                                                                                                   |                                                           |                                            | Low risk of bias  |
| Ortiz et al. 2014(4)           |                                                                     |                                                                                              |                                                        |                                      |                                                          |                                                                                                            |                                                         |                                                                                         |                                                                                                   |                                                           |                                            | Low risk of bias  |
| Benoit et al. 2012(67)         |                                                                     |                                                                                              |                                                        |                                      |                                                          |                                                                                                            |                                                         |                                                                                         |                                                                                                   |                                                           |                                            | Low risk of bias  |
| Vos et al. 2021Vos, 2021 #986} |                                                                     |                                                                                              |                                                        |                                      |                                                          |                                                                                                            |                                                         |                                                                                         |                                                                                                   |                                                           |                                            | Low risk of bias  |

|                             |  |  |  |  |  |  |  |  |  |  |  |                     |
|-----------------------------|--|--|--|--|--|--|--|--|--|--|--|---------------------|
| Chaves et al.<br>2013(38)   |  |  |  |  |  |  |  |  |  |  |  | Low risk<br>of bias |
| Ishida et al.<br>2022(35)   |  |  |  |  |  |  |  |  |  |  |  | Low risk<br>of bias |
| Nam et al.<br>2020(37)      |  |  |  |  |  |  |  |  |  |  |  | Low risk<br>of bias |
| Komeda et al.<br>2021(68)   |  |  |  |  |  |  |  |  |  |  |  | Low risk<br>of bias |
| Hosogaya et<br>al. 2021(49) |  |  |  |  |  |  |  |  |  |  |  | Low risk<br>of bias |
| Yamana et al.<br>2021(1)    |  |  |  |  |  |  |  |  |  |  |  | Low risk<br>of bias |
| Wallick et al.<br>2021(69)  |  |  |  |  |  |  |  |  |  |  |  | Low risk<br>of bias |

**Table S4. JBI quality appraisal of included cross-sectional studies**

|                           | Were criteria for inclusion in the sample clearly defined? | Were the study subjects and the setting described in detail? | Was the exposure measured in a valid and reliable way? | Were objective, standard criteria used for measurement of the condition? | Were confounding factors identified? | Were strategies to deal with confounding factors stated? | Were the outcomes measured in a valid and reliable way? | Was appropriate statistical analysis used? | Overall appraisal |
|---------------------------|------------------------------------------------------------|--------------------------------------------------------------|--------------------------------------------------------|--------------------------------------------------------------------------|--------------------------------------|----------------------------------------------------------|---------------------------------------------------------|--------------------------------------------|-------------------|
| Collins et al. 2019(70)   |                                                            |                                                              |                                                        |                                                                          |                                      |                                                          |                                                         |                                            | Low risk of bias  |
| Dal Negro et al. 2018(30) |                                                            |                                                              |                                                        |                                                                          |                                      |                                                          |                                                         |                                            | Low risk of bias  |
| Tsuzuki et al. 2020(42)   |                                                            |                                                              |                                                        |                                                                          |                                      |                                                          |                                                         |                                            | Unclear           |
| Ahmed et al. 2020(50)     |                                                            |                                                              |                                                        |                                                                          |                                      |                                                          |                                                         |                                            | Low risk of bias  |
| Tsai et al. 2014. (47)    |                                                            |                                                              |                                                        |                                                                          |                                      |                                                          |                                                         |                                            | Low risk of bias  |
| Chung et al. 2022. (71)   |                                                            |                                                              |                                                        |                                                                          |                                      |                                                          |                                                         |                                            | Low risk of bias  |

|                         |  |  |  |  |  |  |  |  |  |  |                  |
|-------------------------|--|--|--|--|--|--|--|--|--|--|------------------|
| Derqui et al. 2022. (2) |  |  |  |  |  |  |  |  |  |  | Low risk of bias |
|-------------------------|--|--|--|--|--|--|--|--|--|--|------------------|

**Table S5. JBI quality appraisal of included economic evaluation studies**

|                           | Is there a well-defined question? | Is there comprehensive description of alternatives? | Are all important and relevant costs and outcomes for each alternative identified? | Has clinical effectiveness been established? | Are costs and outcomes measured accurately? | Are costs and outcomes valued credibly? | Are costs and outcomes adjusted for differential timing? | Is there an incremental analysis of costs and consequences? | Were sensitivity analyses conducted to investigate uncertainty in estimates of costs or consequences? | Do study results include all issues of concern to users? | Are the results generalizable to the setting of interest in the review? | Overall appraisal |
|---------------------------|-----------------------------------|-----------------------------------------------------|------------------------------------------------------------------------------------|----------------------------------------------|---------------------------------------------|-----------------------------------------|----------------------------------------------------------|-------------------------------------------------------------|-------------------------------------------------------------------------------------------------------|----------------------------------------------------------|-------------------------------------------------------------------------|-------------------|
| Tempia et al. 2019(44)    |                                   |                                                     |                                                                                    |                                              |                                             |                                         |                                                          |                                                             |                                                                                                       |                                                          |                                                                         | Low risk of bias  |
| De Miguel et al. 2022(28) |                                   |                                                     |                                                                                    |                                              |                                             |                                         |                                                          |                                                             |                                                                                                       |                                                          |                                                                         | Low risk of bias  |
| Karve et al. 2013(51)     |                                   |                                                     |                                                                                    |                                              |                                             |                                         |                                                          |                                                             |                                                                                                       |                                                          |                                                                         | Low risk of bias  |

**Table S6. JBI quality appraisal of included case-control studies**

|                         | Were the groups comparable other than the presence of disease in cases or the absence of disease in controls? | Were cases and controls matched appropriately? | Were the same criteria used for identification of cases and controls? | Was exposure measured in a standard, valid and reliable way? | Was exposure measured in the same way for cases and controls? | Were confounding factors identified? | Were strategies to deal with confounding factors stated? | Were outcomes assessed in a standard, valid and reliable way for cases and controls? | Was the exposure period of interest long enough to be meaningful? | Was appropriate statistical analysis used? | Overall appraisal |
|-------------------------|---------------------------------------------------------------------------------------------------------------|------------------------------------------------|-----------------------------------------------------------------------|--------------------------------------------------------------|---------------------------------------------------------------|--------------------------------------|----------------------------------------------------------|--------------------------------------------------------------------------------------|-------------------------------------------------------------------|--------------------------------------------|-------------------|
| Samson et al. 2019(39)  |                                                                                                               |                                                |                                                                       |                                                              |                                                               |                                      |                                                          |                                                                                      |                                                                   |                                            | Low risk of bias  |
| Tinsley et al. 2019(40) |                                                                                                               |                                                |                                                                       |                                                              |                                                               |                                      |                                                          |                                                                                      |                                                                   |                                            | Low risk of bias  |
